# Supplementary material
Source: ML conference proceedings conference paper supplement (https://proceedings.neurips.cc/paper_files/paper/2016/hash/65699726a3c601b9f31bf04019c8593c-Abstract.html)
Supplement: Supplementary file 2 [file 65699726a3c601b9f31bf04019c8593c-Supplemental.zip]

Archive with 1 entries (1 files):
- 852_supp_final.pdf
